# Supplementary material for: Rapid adaptation of a complex trait during experimental evolution of Mycobacterium tuberculosis
Source: eLife. 2022 Jun 21;11:e78454. doi: 10.7554/eLife.78454 (PMC9213004; doi:10.7554/eLife.78454)
Supplement: Figure 2—source data 1. [file elife-78454-fig2-data1.csv]

Strain	Passage	Length (um)
31	0	2.820555556
31	0	3.112222222
31	0	2.443333333
31	0	3.889444444
31	0	3.04
31	0	3.449444444
31	0	3.353333333
31	0	3.422777778
31	0	2.567222222
31	0	4.001666667
31	0	2.201111111
31	0	2.620555556
31	0	3.481111111
31	0	4.190555556
31	0	3.231666667
31	0	3.137777778
31	0	2.677777778
31	0	2.983888889
31	0	3.934444444
31	0	2.353888889
31	8	4.137222222
31	8	2.973888889
31	8	3.061111111
31	8	2.534444444
31	8	2.231111111
31	8	2.004444444
31	8	4.083333333
31	8	2.333888889
31	8	2.711111111
31	8	2.634444444
31	8	4.039444444
31	8	4.125
31	8	2.800555556
31	8	2.368888889
31	8	4.386111111
31	8	3.288888889
31	8	3.19
31	8	2.441111111
31	8	2.054444444
31	8	3.156111111
49	0	2.385
49	0	3.031111111
49	0	1.944444444
49	0	2.516666667
49	0	2.333333333
49	0	2.661111111
49	0	2.695
49	0	2.377777778
49	0	3.682777778
49	0	2.471666667
49	0	4.041666667
49	0	3.108333333
49	0	3.408888889
49	0	2.922222222
49	0	3.089444444
49	0	4.520555556
49	0	3.862777778
49	0	2.663888889
49	0	4.09
49	0	3.575
49	8	2.96
49	8	3.136666667
49	8	3.335555556
49	8	2.944444444
49	8	3.350555556
49	8	3.413333333
49	8	3.780555556
49	8	2.955555556
49	8	4.605
49	8	2.951111111
49	8	3.220555556
49	8	2.503888889
49	8	2.460555556
49	8	2.946666667
49	8	3.105555556
49	8	2.59
49	8	3.525555556
49	8	2.716666667
49	8	3.084444444
49	8	2.476111111
55	0	2.650555556
55	0	2.688333333
55	0	2.167777778
55	0	2.92
55	0	3.056111111
55	0	2.856666667
55	0	2.858333333
55	0	2.95
55	0	1.822222222
55	0	2.607222222
55	0	2.836111111
55	0	2.196111111
55	0	2.274444444
55	0	2.751111111
55	0	2.092777778
55	0	2.426666667
55	0	2.468333333
55	0	2.545
55	0	2.878333333
55	0	2.137777778
55	8	3.073333333
55	8	2.850555556
55	8	3.406666667
55	8	3.932222222
55	8	2.616666667
55	8	2.609444444
55	8	2.699444444
55	8	2.49
55	8	2.852777778
55	8	3.353888889
55	8	3.039444444
55	8	3.211111111
55	8	3.684444444
55	8	2.718333333
55	8	3.183888889
55	8	3.580555556
55	8	2.622777778
55	8	3.172222222
55	8	2.686666667
55	8	3.242222222
72	0	2.4
72	0	2.030555556
72	0	2.46
72	0	2.191666667
72	0	2.347222222
72	0	2.417777778
72	0	2.723333333
72	0	3.447222222
72	0	1.896111111
72	0	2.452777778
72	0	4.085
72	0	3.008888889
72	0	2.48
72	0	3.006111111
72	0	3.222222222
72	0	3.841666667
72	0	2.417777778
72	0	2.423888889
72	0	2.637777778
72	0	2.79
72	8	3.287671233
72	8	4.071232877
72	8	3.471232877
72	8	3.165753425
72	8	3.106849315
72	8	2.938356164
72	8	2.778082192
72	8	3.616438356
72	8	2.935616438
72	8	3.809589041
72	8	3.1
72	8	2.770555556
72	8	3.613888889
72	8	2.891111111
72	8	2.658333333
72	8	3.048333333
72	8	3.747777778
72	8	4.515555556
72	8	3.059444444
72	8	3.421111111
345	0	3.135555556
345	0	3.671111111
345	0	2.633888889
345	0	4.502222222
345	0	3.021666667
345	0	3.652222222
345	0	3.379444444
345	0	3.292222222
345	0	3.392222222
345	0	2.980555556
345	0	2.404444444
345	0	2.034444444
345	0	2.752222222
345	0	2.453333333
345	0	2.993888889
345	0	2.546666667
345	0	2.225
345	0	2.738888889
345	0	2.505
345	0	2.688888889
345	8	2.850684932
345	8	1.919178082
345	8	2.37260274
345	8	2.034246575
345	8	2.216438356
345	8	1.906849315
345	8	2.430136986
345	8	2.295890411
345	8	2.279452055
345	8	2.075342466
345	8	3.356666667
345	8	2.781111111
345	8	2.278888889
345	8	2.817222222
345	8	3.168333333
345	8	3.500555556
345	8	2.156111111
345	8	2.873888889
345	8	2.473888889
345	8	2.782222222
540	0	3.73
540	0	4.901666667
540	0	2.964444444
540	0	3.713888889
540	0	3.657777778
540	0	2.222777778
540	0	4.446666667
540	0	2.686666667
540	0	2.288333333
540	0	3.329444444
540	0	3.007777778
540	0	4.102777778
540	0	2.117222222
540	0	3.235555556
540	0	3.253888889
540	0	2.912222222
540	0	5.352777778
540	0	4.708333333
540	0	4.666666667
540	0	1.9
540	0	3.459944444
540	0	0.995696048
540	8	2.584931507
540	8	2.491780822
540	8	3.478082192
540	8	2.628767123
540	8	2.550684932
540	8	2.8
540	8	2.498630137
540	8	2.836986301
540	8	2.810958904
540	8	2.747945205
540	8	4.196666667
540	8	4.297777778
540	8	3.001111111
540	8	2.898888889
540	8	4.588888889
540	8	3.611111111
540	8	2.527222222
540	8	2.408888889
540	8	4.100555556
540	8	2.208888889
540	8	3.063438356
540	8	0.717086652
