# Supplementary material for: Rapid adaptation of a complex trait during experimental evolution of Mycobacterium tuberculosis
Source: eLife. 2022 Jun 21;11:e78454. doi: 10.7554/eLife.78454 (PMC9213004; doi:10.7554/eLife.78454)
Supplement: Figure 3—source data 1. [file elife-78454-fig3-data1.csv]

Strain	Weight (g)	Passage	Replicate
MT31	0.7196	1	1
MT31	0.6425	1	2
MT49	0.854	1	1
MT49	0.8443	1	2
MT55	0.6544	1	1
MT55	0.6255	1	2
MT540	0.8284	1	1
MT540	0.6914	1	2
MT345	3.7482	8	1
MT345	3.9895	8	2
MT345	3.9297	8	3
MT55	4.4143	8	1
MT55	3.919	8	2
MT55	4.0885	8	3
MT540	1.6361	8	1
MT540	1.7464	8	2
MT540	2.315	8	3
MT345	1.2362	1	1
MT345	1.3112	1	2
MT345	2.1372	1	3
MT72	2.068	8	1
MT72	1.9615	8	2
MT72	1.8502	8	3
MT72	0.542	1	1
MT72	0.6477	1	2
MT72	0.6655	1	3
MT31	1.579	8	1
MT31	1.8447	8	2
MT31	2.0473	8	3
MT49	1.0331	8	1
MT49	2.3718	8	2
H37Rv	4.749	8	1
H37Rv	5.4638	8	2
H37Rv	4.5968	8	3
H37Rv	4.1313	8	4
H37Rv	4.3201	8	5
