# Supplementary material for: Rapid adaptation of a complex trait during experimental evolution of Mycobacterium tuberculosis
Source: eLife. 2022 Jun 21;11:e78454. doi: 10.7554/eLife.78454 (PMC9213004; doi:10.7554/eLife.78454)
Supplement: Figure 4—source data 1. [file elife-78454-fig4-data1.csv]

Sample	0	Avg. 0	Std. Dev. 0	2	Avg. 2	Std. Dev. 2	3	Avg. 3	Std. Dev. 3	4	Avg. 4	Std. Dev. 4	5	Avg. 5	Std. Dev. 5	6	Avg. 6	Std. Dev. 6	7	Avg. 7	Std. Dev. 7	8	Avg. 8	Std. Dev. 8	9	Avg. 9	Std. Dev. 9	10	Avg. 10	Std. Dev 10
31-0 A	0.02	0.02	0	0.2	0.21	0.01	0.37	0.38	0.02	0.72	0.74	0.02	1.03	1.05	0.02	1.36	1.4	0.08	1.75	1.76	0.04	2.78	2.77	0.03	3.12	2.38	0.644670458	2.34	1.853333333	0.421584313
31-0 B	0.02			0.22			0.38			0.76			1.07			1.49			1.8			2.74			2.08			1.62
31-0 C	0.02			0.21			0.4			0.73			1.04			1.36			1.72			2.8			1.94			1.6
49-0 A	0.02	0.02	0	0.05	0.05	0.01	0.05	0.05	0.01	0.06	0.06	0.01	0.06	0.07	0.02	0.09	0.11	0.02	0.14	0.17	0.04	0.23	0.26	0.04	0.36	0.393333333	0.057735027	0.5	0.53	0.079372539
49-0 B	0.02			0.06			0.06			0.07			0.09			0.13			0.22			0.3			0.46			0.62
49-0 C	0.02			0.05			0.04			0.05			0.05			0.1			0.15			0.24			0.36			0.47
55-0 A	0.02	0.02	0	0.21	0.22	0.01	0.38	0.39	0.02	0.76	0.79	0.04	0.96	1.05	0.09	1.41	1.46	0.04	1.75	1.78	0.04	2.88	3.05	0.17	2.98	3.206666667	0.205264058	2.72	2.666666667	0.224796204
55-0 B	0.02			0.23			0.37			0.79			1.05			1.47			1.77			3.22			3.38			2.86
55-0 C	0.02			0.23			0.41			0.83			1.14			1.49			1.83			3.06			3.26			2.42
72-0 A	0.02	0.02	0	0.19	0.18	0.02	0.27	0.26	0.01	0.42	0.42	0.01	0.67	0.63	0.04	0.75	0.77	0.02	0.99	0.99	0.02	1.21	1.23	0.04	1.94	1.933333333	0.030550505	2.24	2.066666667	0.250066658
72-0 B	0.02			0.16			0.25			0.41			0.59			0.76			0.97			1.2			1.9			1.78
72-0 C	0.02			0.19			0.27			0.42			0.63			0.79			1			1.27			1.96			2.18
345-0 A	0.02	0.02	0	0.03	0.03	0	0.04	0.05	0.01	0.04	0.05	0.01	0.05	0.05	0.01	0.08	0.09	0.02	0.09	0.1	0.02	0.09	0.1	0.01	0.09	0.096666667	0.011547005	0.06	0.076666667	0.02081666
345-0 B	0.02			0.03			0.05			0.06			0.06			0.11			0.12			0.11			0.11			0.1
345-0 C	0.02			0.03			0.06			0.05			0.05			0.09			0.09			0.11			0.09			0.07
540-0 A	0.02	0.02	0	0.06	0.06	0	0.07	0.08	0.01	0.11	0.11	0	0.16	0.15	0.01	0.24	0.23	0.01	0.31	0.31	0.02	0.36	0.38	0.03	0.52	0.523333333	0.025166115	0.58	0.576666667	0.025166115
540-0 B	0.02			0.06			0.08			0.11			0.15			0.23			0.32			0.42			0.55			0.6
540-0 C	0.02			0.06			0.08			0.11			0.15			0.23			0.29			0.37			0.5			0.55
31-8 A	0.02	0.02	0	0.32	0.32	0	0.76	0.75	0.01	1.2	1.19	0.01	1.55	1.55	0.03	1.85	1.86	0.01	2.64	2.67	0.06	2.66	2.59	0.08	2.2	2.04	0.150996689	1.84	1.806666667	0.113724814
31-8 B	0.02			0.32			0.75			1.19			1.52			1.85			2.74			2.62			2.02			1.9
31-8 C	0.02			0.32			0.75			1.19			1.57			1.87			2.62			2.5			1.9			1.68
49-8 A	0.02	0.02	0	0.13	0.14	0.01	0.22	0.25	0.03	0.34	0.36	0.03	0.48	0.45	0.04	0.51	0.56	0.1	0.7	0.74	0.12	0.77	0.95	0.18	1.05	1.196666667	0.145028733	1.33	1.423333333	0.106926766
49-8 B	0.02			0.15			0.27			0.39			0.47			0.67			0.88			1.13			1.34			1.54
49-8 C	0.02			0.13			0.25			0.35			0.41			0.5			0.64			0.94			1.2			1.4
55-8 A	0.02	0.02	0	0.13	0.13	0.01	0.32	0.31	0.02	0.8	0.8	0	1.56	1.44	0.11	2.28	2.33	0.04	2.98	3.06	0.07	2.96	3.17	0.19	2.92	3.013333333	0.100664459	2.08	2.633333333	0.481802172
55-8 B	0.02			0.13			0.33			0.8			1.34			2.34			3.08			3.34			3.12			2.86
55-8 C	0.02			0.14			0.29			0.8			1.42			2.36			3.12			3.22			3			2.96
72-8 A	0.02	0.02	0	0.17	0.17	0.02	0.29	0.28	0.02	0.51	0.51	0.08	0.76	0.75	0.08	0.96	0.98	0.11	1.14	1.16	0.06	1.25	1.15	0.11	1.12	1.14	0.02	1.34	1.346666667	0.030550505
72-8 B	0.02			0.16			0.25			0.43			0.67			0.89			1.11			1.03			1.14			1.32
72-8 C	0.02			0.19			0.29			0.58			0.82			1.1			1.23			1.16			1.16			1.38
345-8 A	0.02	0.02	0	0.41	0.39	0.02	0.65	0.66	0.01	0.91	0.96	0.05	1.12	1.13	0.01	1.31	1.21	0.17	1.36	1.28	0.17	1.35	1.27	0.17	1.9	1.646666667	0.325166624	2.04	1.78	0.367151195
345-8 B	0.02			0.39			0.66			1.01			1.14			1.01			1.08			1.08			1.28			1.36
345-8 C	0.02			0.38			0.66			0.97			1.13			1.3			1.4			1.38			1.76			1.94
540-8 A	0.02	0.02	0	0.05	0.05	0	0.06	0.06	0	0.06	0.06	0.01	0.07	0.07	0.01	0.09	0.09	0.01	0.09	0.09	0.02	0.08	0.09	0.02	0.12	0.123333333	0.015275252	0.12	0.133333333	0.023094011
540-8 B	0.02			0.05			0.06			0.07			0.08			0.09			0.11			0.11			0.14			0.16
540-8 C	0.02			0.05			0.06			0.06			0.06			0.08			0.08			0.08			0.11			0.12
H37Rv A	0.02	0.02	0	0.24	0.22	0.04	0.5	0.51	0.06	1.22	1.15	0.14	1.74	1.81	0.11	2.48	2.58	0.25	3.2	3.29	0.22	3.72	3.81	0.14	3.68	3.813333333	0.117189306	3.52	3.573333333	0.12858201
H37Rv B	0.02			0.25			0.57			1.24			1.94			2.86			3.54			3.98			3.9			3.72
H37Rv B	0.02			0.18			0.46			0.98			1.76			2.4			3.12			3.74			3.86			3.48
