# Supplementary material for: Rapid adaptation of a complex trait during experimental evolution of Mycobacterium tuberculosis
Source: eLife. 2022 Jun 21;11:e78454. doi: 10.7554/eLife.78454 (PMC9213004; doi:10.7554/eLife.78454)
Supplement: Figure 7—source data 1. [file elife-78454-fig7-data1.xlsx]

## Sheet: Figure6B_rawData
Sample	∆Ct	Avg ∆Ct	St Dev ∆Ct	Avg Control ∆Ct	St Dev Control ∆Ct	∆∆Ct (3)	Mean Fold Change	St Dev of Fold Change (4)	LowFC	HighFC	log2FC	log2LowFC	log2HighFC
49-AP	3.39045	3.27492	0.0937879	3.6419	0.746065	-0.366985	1.28965	0.434131	1.20848	1.37628	0.366985	0.273197	0.460773
	3.16073			3.6419	0.746065
	3.27358			3.6419	0.746065
49-EP	1.68666	1.63462	0.270863	3.6419	0.746065	-2.00729	4.02025	0.45825	3.33208	4.85055	2.00729	1.73642	2.27815
	1.27993			3.6419	0.746065
	1.93726			3.6419	0.746065
49-AB	2.76477	2.22891	0.382857	3.6419	0.746065	-1.413	2.6629	0.484146	2.04222	3.47221	1.413	1.03014	1.79585
	1.89386			3.6419	0.746065
	2.02809			3.6419	0.746065
49-EB	1.14969	1.33359	0.170279	3.6419	0.746065	-2.30832	4.95304	0.441817	4.40163	5.57354	2.30832	2.13804	2.47859
	1.29089			3.6419	0.746065
	1.56018			3.6419	0.746065
540-EP	2.09932	2.18709	0.11245	3.6419	0.746065	-1.45482	2.74122	0.435606	2.53567	2.96343	1.45482	1.34237	1.56727
	2.11612			3.6419	0.746065
	2.34582			3.6419	0.746065
540-AB	3.1097	2.81452	0.289927	3.6419	0.746065	-0.827383	1.77446	0.462122	1.45141	2.16942	0.827383	0.537455	1.11731
	2.42048			3.6419	0.746065
	2.91339			3.6419	0.746065
540-EB (1)	0.843949	1.17777	0.333825	3.6419	0.746065	-2.46413	5.51794	0.491179	4.3781	6.95454	2.46413	2.13031	2.79796
	1.5116			3.6419	0.746065
540-AP (2)	4.13167	3.6419	0.746065	3.6419	0.746065	-3.55271e-15	1	0.60916	0.596228	1.67721	3.52377e-15	-0.746065	0.746065
	4.20636			3.6419	0.746065
	2.58769			3.6419	0.746065
1. Only 2 replicates
2. Reference condition
3. Difference between average sample ∆Ct and average reference ∆Ct
4. σd = sqrt( σ12 / n1 + σ22 / n2 )

## Sheet: Figure6B_log2fold
Sample	Strain	Genotype	Condition	Grouping	Log2MeanFC	Log2LowFC	Log2HighFC
540-0P	540	Ancestral	Planktonic	AP	0	-0.746065	0.746065
49-0P	49	Ancestral	Planktonic	AP	0.366985	0.273197	0.460773
540-0B	540	Ancestral	Biofilm	AB	0.827383	0.537455	1.11731
49-0B	49	Ancestral	Biofilm	AB	1.413	1.03014	1.79585
540-4P	540	Evolved	Planktonic	EP	1.45482	1.34237	1.56727
49-12P	49	Evolved	Planktonic	EP	2.00729	1.73642	2.27815
540-4B	540	Evolved	Biofilm	EB	2.46413	2.13031	2.79796
49-12B	49	Evolved	Biofilm	EB	2.30832	2.13804	2.47859

## Sheet: Figure6C
Construct	Replicate	Empty Bottle (g)	Weight (g)	Wet weight (g)
H37Rv-CT94-lpdA	A	40.8301	44.8391	4.009
H37Rv-CT94-lpdA	B	41.0886	45.4767	4.3881
H37Rv-CT94-lpdA	C	41.0053	45.4948	4.4895
H37Rv-CT94	A	41.2183	44.3301	3.1118
H37Rv-CT94	B	40.8363	44.455	3.6187
H37Rv-CT94	C	41.5322	45.1381	3.6059
