# Supplementary material for: Rapid adaptation of a complex trait during experimental evolution of Mycobacterium tuberculosis
Source: eLife. 2022 Jun 21;11:e78454. doi: 10.7554/eLife.78454 (PMC9213004; doi:10.7554/eLife.78454)
Supplement: Supplementary file 1. [file elife-78454-supp1.xlsx]

## Sheet: Sheet1
	P0	P4	P8	P12	P16	P20
MT31	sequencing wet weight growth curve SEM		sequencing wet weight growth curve SEM	sequencing	sequencing	sequencing
MT49	sequencing wet weight growth curve SEM		sequencing wet weight growth curve SEM	sequencing	sequencing	sequencing
MT72	sequencing wet weight growth curve SEM	sequencing	sequencing wet weight growth curve SEM	sequencing	sequencing
MT345	sequencing wet weight growth curve SEM	sequencing	sequencing wet weight growth curve SEM	sequencing	sequencing
MT55	sequencing wet weight growth curve SEM	sequencing	sequencing wet weight growth curve SEM
MT540	sequencing wet weight growth curve SEM	sequencing	sequencing wet weight growth curve SEM
