# Supplementary material for: Rapid adaptation of a complex trait during experimental evolution of Mycobacterium tuberculosis
Source: eLife. 2022 Jun 21;11:e78454. doi: 10.7554/eLife.78454 (PMC9213004; doi:10.7554/eLife.78454)
Supplement: Supplementary file 3. — Of note is enrichment of nucleotide biosynthesis/metabolic processes. [file elife-78454-supp3.csv]

GO.ID	Term	Annotated	Observed	Expected	classicFisher
GO:0009116	nucleoside metabolic process	31	6	1.29	0.0014
GO:1901657	glycosyl compound metabolic process	43	7	1.79	0.0017
GO:0034404	nucleobase-containing small molecule biosynthetic process	25	5	1.04	0.0031
GO:1901136	carbohydrate derivative catabolic process	26	5	1.08	0.0037
GO:0055086	nucleobase-containing small molecule metabolic process	170	15	7.08	0.0037
GO:0034654	nucleobase-containing compound biosynthetic process	352	25	14.66	0.0038
GO:0018130	heterocycle biosynthetic process	454	29	18.91	0.0083
GO:0000725	recombinational repair	11	3	0.46	0.0091
GO:0052646	alditol phosphate metabolic process	11	3	0.46	0.0091
