# Supplementary material for: Rapid adaptation of a complex trait during experimental evolution of Mycobacterium tuberculosis
Source: eLife. 2022 Jun 21;11:e78454. doi: 10.7554/eLife.78454 (PMC9213004; doi:10.7554/eLife.78454)
Supplement: Supplementary file 4. — ‘Ref’ and ‘alt’ refer to the alleles present in the reference strain (H37Rv) and the clinical isolate, respectively. Mutations without an annotation exist in intergenic regions. [file elife-78454-supp4.xlsx]

## Sheet: MT31-MT55
POSITON	REF	ALT	ANNOTATION
839309	T	G	ID=gene767;Dbxref=GeneID:888662;Name=PE_PGRS10;gbkey=Gene;gene=PE_PGRS10;gene_biotype=protein_coding;locus_tag=Rv0747
1313337	A	AG
1313338	A	C
1987702	G	GGTTCTGCGGCATGATGCGCCAACCGAATCTCCGCACCGGTTGGAAAGTGGGACTCTGCAGCTCCGGCCCACCATTTTGGCCGTCGGGGTCGATGGTGGCGCTCAGCCAATAAAGGCGGTTGGGCAGGGTGGGACCCAATACCGAGCAAAAGTAGCGGTCGCAGACGGTGAACGCGTCGGCCAACAGATAGTGGATCGGAATGTCTTGGCGCGTGTAGTAGCCCATCACCGTGGGAGTGTGGGCCGCCGAGCGAGTCTTGGCCTGCGCTGGTAGCCAGTTGTCGTTGACGCCACCATTCCACGACTCATGCATCGCCACCCAGCTATGGTCAGGGTCGTTGACACACGCGCCGTCGAGGAACGGGCCTCGGGTGGTGTCGAAGCGGTAGGGCATCGTAA…
1992323	G	GC	ID=gene1799;Dbxref=GeneID:885325;Name=wag22;gbkey=Gene;gene=wag22;gene_biotype=protein_coding;locus_tag=Rv1759c
3380439	G	GC
3737466	AGCCGCTGCCGCCGGCGCCGCCGGCGCCGCCGCCACC	A	ID=gene3421;Dbxref=GeneID:888115;Name=PE_PGRS49;gbkey=Gene;gene=PE_PGRS49;gene_biotype=protein_coding;locus_tag=Rv3344c
3843678	CACACCATGGTGA	C	ID=gene3502;Dbxref=GeneID:887622;Name=PPE58;gbkey=Gene;gene=PPE58;gene_biotype=protein_coding;locus_tag=Rv3426
3844992	T	A	ID=gene3504;Dbxref=GeneID:887621;Name=Rv3428c;gbkey=Gene;gene_biotype=protein_coding;locus_tag=Rv3428c
3846605	G	A
3846607	A	C
3846622	G	T
3846687	A	G
3846773	T	TG
3846840	G	GCT
3846843	CAAA	C
3846851	G	A
3846852	C	G
3846853	T	C
3846857	G	A
3846860	T	G
3846866	C	A
3846881	AT	A
3846886	A	T
3846897	T	G
3847010	G	C
3847014	C	G
3847022	T	C
3847039	G	A
3847052	G	A
3847073	G	C
3847074	C	G
3847087	G	A
3847090	G	C
3847099	G	A
3947206	C	G	ID=gene3587;Dbxref=GeneID:888294;Name=PE_PGRS57;gbkey=Gene;gene=PE_PGRS57;gene_biotype=protein_coding;locus_tag=Rv3514

## Sheet: MT49-MT540
POSITON	REF	ALT	ANNOTATION
33841	C	G
37553	T	TTCATGACTCGGCTCGGCCCAC	ID=gene36;Dbxref=GeneID:887048;Name=fadD34;gbkey=Gene;gene=fadD34;gene_biotype=protein_coding;locus_tag=Rv0035
63214	C	T	ID=gene60;Dbxref=GeneID:887006;Name=Rv0059;gbkey=Gene;gene_biotype=protein_coding;locus_tag=Rv0059
70036	G	A	ID=gene66;Dbxref=GeneID:886996;Name=Rv0064;gbkey=Gene;gene_biotype=protein_coding;locus_tag=Rv0064
71584	C	CCGAGCGCTGTTCTGGCGCTAATCTGACGCTAGAATAG
80482	C	CTGAACCGCCCCGGTGAGTCCGGAGACTCTCTGATCTGAGACCTCAGCCGGCGGCTGGTCTCTGGCGTTGAGCGTAGTAGGCAGCCTCGAGTTCGACCGGCGGGACGTCGCCGCAGTACTGGTAGAGGCGGCGATGGTTGAACCAGTCGACCCAGCGCGCGGTGGCCAACTCGACATCCTCGATGGACCGCCAGGGCTTGCCGGGTTTGATCAGCTCGGTCTTGTATAGNNNNNNNNNNGGAACCACCTGACATGACCCCATCCTTTCCAAGAACTGGAGTCTCCGGACATGCCGGGGCGGTTCATCC
84908	C	T	ID=gene78;Dbxref=GeneID:886982;Name=Rv0075;gbkey=Gene;gene_biotype=protein_coding;locus_tag=Rv0075
104944	G	A	ID=gene100;Dbxref=GeneID:886940;Name=Rv0095c;gbkey=Gene;gene_biotype=protein_coding;locus_tag=Rv0095c
178297	A	C	ID=gene157;Dbxref=GeneID:886857;Name=PE1;gbkey=Gene;gene=PE1;gene_biotype=protein_coding;locus_tag=Rv0151c
210138	T	C	ID=gene186;Dbxref=GeneID:886796;Name=lprO;gbkey=Gene;gene=lprO;gene_biotype=protein_coding;locus_tag=Rv0179c
224901	C	G	ID=gene201;Dbxref=GeneID:886764;Name=Rv0193c;gbkey=Gene;gene_biotype=protein_coding;locus_tag=Rv0193c
252083	A	C	ID=gene219;Dbxref=GeneID:886744;Name=pckA;gbkey=Gene;gene=pckA;gene_biotype=protein_coding;gene_synonym=pck1,pckG;locus_tag=Rv0211
263306	T	C	ID=gene228;Dbxref=GeneID:886722;Name=lipC;gbkey=Gene;gene=lipC;gene_biotype=protein_coding;locus_tag=Rv0220
304902	C	T	ID=gene262;Dbxref=GeneID:886665;Name=nirB;gbkey=Gene;gene=nirB;gene_biotype=protein_coding;gene_synonym=nasB;locus_tag=Rv0252
321338	T	TC	ID=gene277;Dbxref=GeneID:886644;Name=narU;gbkey=Gene;gene=narU;gene_biotype=protein_coding;locus_tag=Rv0267
329923	T	C	ID=gene283;Dbxref=GeneID:886633;Name=Rv0273c;gbkey=Gene;gene_biotype=protein_coding;locus_tag=Rv0273c
331502	G	A	ID=gene285;Dbxref=GeneID:886629;Name=Rv0275c;gbkey=Gene;gene_biotype=protein_coding;locus_tag=Rv0275c
338854	C	G	ID=gene290;Dbxref=GeneID:886621;Name=PE_PGRS4;gbkey=Gene;gene=PE_PGRS4;gene_biotype=protein_coding;locus_tag=Rv0279c
355181	G	A	ID=gene302;Dbxref=GeneID:886615;Name=mycP3;gbkey=Gene;gene=mycP3;gene_biotype=protein_coding;locus_tag=Rv0291
358527	A	G	ID=gene305;Dbxref=GeneID:886593;Name=tam;gbkey=Gene;gene=tam;gene_biotype=protein_coding;locus_tag=Rv0294
361145	T	C	ID=gene307;Dbxref=GeneID:886600;Name=atsG;gbkey=Gene;gene=atsG;gene_biotype=protein_coding;gene_synonym=atsG;locus_tag=Rv0296c
383081	A	G	ID=gene325;Dbxref=GeneID:886564;Name=Rv0314c;gbkey=Gene;gene_biotype=protein_coding;locus_tag=Rv0314c
387245	C	T	ID=gene331;Dbxref=GeneID:886555;Name=pcp;gbkey=Gene;gene=pcp;gene_biotype=protein_coding;locus_tag=Rv0319
425193	A	T	ID=gene367;Dbxref=GeneID:886491;Name=PPE8;gbkey=Gene;gene=PPE8;gene_biotype=protein_coding;locus_tag=Rv0355c
482418	C	T	ID=gene414;Dbxref=GeneID:886413;Name=mmpL1;gbkey=Gene;gene=mmpL1;gene_biotype=protein_coding;locus_tag=Rv0402c
486858	T	TGAACCGCCCCGGTGAGTCCGGAGACTCTCTGATCTGAGACCTCAGCCGGCGGCTGGTCTCTGGCGTTGAGCGTAGTAGGCAGCCTCGAGTTCGACCGGCGGGACGTCGCCGCAGTACTGGTAGAGGCGGCGATGGTTGAACCAGTCGACCCAGCGCGCGGTGGCCAACTCGACATCCTCGATGGACCGCCAGGGCTTGCCGGGTTTGATCAGCTCGGTCTTGTATAGGCCGTTGATCGTCTCGGCTAGNNNNNNNNNNCCAACACCAAGTAGACGGGCGACCTCACTGATCGCTGCCCACTCCGAATCGTGCTGACCGCGGATCTCTGCGACCATCCGCACCGCCCGCTCACGCAGCTCCGGCGGGTACCTCCTCGATGAACCACCTGACATGACCCC…	ID=gene417;Dbxref=GeneID:886407;Name=pks6;gbkey=Gene;gene=pks6;gene_biotype=protein_coding;locus_tag=Rv0405
506386	T	C	ID=gene431;Dbxref=GeneID:886388;Name=lpqM;gbkey=Gene;gene=lpqM;gene_biotype=protein_coding;locus_tag=Rv0419
542900	C	T
564078	C	A	ID=gene487;Dbxref=GeneID:886279;Name=Rv0473;gbkey=Gene;gene_biotype=protein_coding;locus_tag=Rv0473
589290	C	CG	ID=gene514;Dbxref=GeneID:887243;Name=Rv0499;gbkey=Gene;gene_biotype=protein_coding;locus_tag=Rv0499
595374	T	C
623297	G	GTCGGGGGTACCGGTGCGGCCGGCGGGGCCGGCGGGACCGGCGGGTGGCTGTTCGGCAACGGCGGGGCCGGCGGGACCGGCGGGG	ID=gene547;Dbxref=GeneID:887391;Name=PE_PGRS6;gbkey=Gene;gene=PE_PGRS6;gene_biotype=protein_coding;locus_tag=Rv0532
624023	A	T	ID=gene547;Dbxref=GeneID:887391;Name=PE_PGRS6;gbkey=Gene;gene=PE_PGRS6;gene_biotype=protein_coding;locus_tag=Rv0532
648992	C	G	ID=gene572;Dbxref=GeneID:887609;Name=mgtA;gbkey=Gene;gene=mgtA;gene_biotype=protein_coding;gene_synonym=mtfB;locus_tag=Rv0557
668887	AC	A	ID=gene591;Dbxref=GeneID:887720;Name=Rv0575c;gbkey=Gene;gene_biotype=protein_coding;locus_tag=Rv0575c
705062	G	C	ID=gene626;Dbxref=GeneID:887890;Name=Rv0610c;gbkey=Gene;gene_biotype=protein_coding;locus_tag=Rv0610c
744624	G	T	ID=gene668;Dbxref=GeneID:888048;Name=Rv0648;gbkey=Gene;gene_biotype=protein_coding;locus_tag=Rv0648
813647	T	C	ID=gene740;Dbxref=GeneID:888433;Name=rplF;gbkey=Gene;gene=rplF;gene_biotype=protein_coding;locus_tag=Rv0719
827465	G	A	ID=gene755;Dbxref=GeneID:888564;Name=mapA;gbkey=Gene;gene=mapA;gene_biotype=protein_coding;gene_synonym=map;locus_tag=Rv0734
874640	C	T
928537	C	G	ID=gene857;Dbxref=GeneID:885369;Name=PE_PGRS14;gbkey=Gene;gene=PE_PGRS14;gene_biotype=protein_coding;locus_tag=Rv0834c
932994	A	T
964099	T	C	ID=gene888;Dbxref=GeneID:885431;Name=moaE2;gbkey=Gene;gene=moaE2;gene_biotype=protein_coding;locus_tag=Rv0866
970204	G	A	ID=gene894;Dbxref=GeneID:885742;Name=PE_PGRS15;gbkey=Gene;gene=PE_PGRS15;gene_biotype=protein_coding;locus_tag=Rv0872c
1042177	G	GA	ID=gene957;Dbxref=GeneID:885724;Name=pstS1;gbkey=Gene;gene=pstS1;gene_biotype=protein_coding;gene_synonym=phoS,phoS1;locus_tag=Rv0934
1075246	A	ATGAACCGCCCCGGCATGTCCGGAGACTCCAGTTCTTGGAAAGGATGGGGTCATGTCANNNNNNNNNNGCCTATACAAGACCGAGCTGATCAAACCCGGCAAGCCCTGGCGGTCCATCGAGGATGTCGAGTTGGCCACCGCGCGCTGGGTCGACTGGTTCAACCATCGCCGCCTCTACCAGTACTGCGGCGACGTCCCGCCGGTCGAACTCGAGGCTGCCTACTACGCTCAACGCCAGAGACCAGCCGCCGGCTGAGGTCTCAGATCAGAGAGTCTCCGGACTCACCGGGGCGGTTCACCA
1106652	A	G	ID=gene1014;Dbxref=GeneID:885355;Name=grcC2;gbkey=Gene;gene=grcC2;gene_biotype=protein_coding;locus_tag=Rv0989c
1121126	C	CA	ID=gene1031;Dbxref=GeneID:886039;Name=Rv1004c;gbkey=Gene;gene_biotype=protein_coding;locus_tag=Rv1004c
1146421	C	T	ID=gene1052;Dbxref=GeneID:886059;Name=Rv1024;gbkey=Gene;gene_biotype=protein_coding;locus_tag=Rv1024
1194414	G	A	ID=gene1093;Dbxref=GeneID:887117;Name=echA8;gbkey=Gene;gene=echA8;gene_biotype=protein_coding;locus_tag=Rv1070c
1212459	C	CGGCGCCGGTGGCGCCGGG	ID=gene1110;Dbxref=GeneID:887094;Name=PE_PGRS21;gbkey=Gene;gene=PE_PGRS21;gene_biotype=protein_coding;locus_tag=Rv1087
1213692	C	CGCCGGTGGCGGCGGCGGGGCCGGCGGCATCGGCGGCGACGGCGGC	ID=gene1110;Dbxref=GeneID:887094;Name=PE_PGRS21;gbkey=Gene;gene=PE_PGRS21;gene_biotype=protein_coding;locus_tag=Rv1087
1224307	C	G
1274703	T	C	ID=gene1166;Dbxref=GeneID:885575;Name=Rv1146;gbkey=Gene;gene_biotype=protein_coding;locus_tag=Rv1146
1277869	G	GT
1306615	G	C	ID=gene1198;Dbxref=GeneID:886053;Name=fadH;gbkey=Gene;gene=fadH;gene_biotype=protein_coding;locus_tag=Rv1175c
1311932	G	A	ID=gene1202;Dbxref=GeneID:886083;Name=Rv1179c;gbkey=Gene;gene_biotype=protein_coding;locus_tag=Rv1179c
1321210	C	T	ID=gene1205;Dbxref=GeneID:886072;Name=papA3;gbkey=Gene;gene=papA3;gene_biotype=protein_coding;locus_tag=Rv1182
1334933	T	C	ID=gene1215;Dbxref=GeneID:886007;Name=Rv1192;gbkey=Gene;gene_biotype=protein_coding;locus_tag=Rv1192
1340667	A	G	ID=gene1220;Dbxref=GeneID:886051;Name=esxK;gbkey=Gene;gene=esxK;gene_biotype=protein_coding;gene_synonym=ES6_3,QILSS,TB11.0;locus_tag=Rv1197
1342581	T	C	ID=gene1222;Dbxref=GeneID:886092;Name=Rv1199c;gbkey=Gene;gene_biotype=protein_coding;locus_tag=Rv1199c
1357309	G	A	ID=gene1237;Dbxref=GeneID:888362;Name=PE14;gbkey=Gene;gene=PE14;gene_biotype=protein_coding;locus_tag=Rv1214c
1369464	C	T	ID=gene1249;Dbxref=GeneID:887144;Name=Rv1226c;gbkey=Gene;gene_biotype=protein_coding;locus_tag=Rv1226c
1388470	G	A	ID=gene1269;Dbxref=GeneID:887091;Name=Rv1245c;gbkey=Gene;gene_biotype=protein_coding;locus_tag=Rv1245c
1396310	G	A	ID=gene1275;Dbxref=GeneID:887080;Name=Rv1251c;gbkey=Gene;gene_biotype=protein_coding;locus_tag=Rv1251c
1446543	G	C	ID=gene1319;Dbxref=GeneID:886964;Name=argS;gbkey=Gene;gene=argS;gene_biotype=protein_coding;locus_tag=Rv1292
1532656	G	T	ID=gene1394;Dbxref=GeneID:886819;Name=PPE19;gbkey=Gene;gene=PPE19;gene_biotype=protein_coding;gene_synonym=mtb39b;locus_tag=Rv1361c
1532659	C	T	ID=gene1394;Dbxref=GeneID:886819;Name=PPE19;gbkey=Gene;gene=PPE19;gene_biotype=protein_coding;gene_synonym=mtb39b;locus_tag=Rv1361c
1532660	T	G	ID=gene1394;Dbxref=GeneID:886819;Name=PPE19;gbkey=Gene;gene=PPE19;gene_biotype=protein_coding;gene_synonym=mtb39b;locus_tag=Rv1361c
1632518	T	TGGCGCCGTTGCCGCCGGCCCCACCGTC	ID=gene1484;Dbxref=GeneID:886605;Name=PE_PGRS27;gbkey=Gene;gene=PE_PGRS27;gene_biotype=protein_coding;locus_tag=Rv1450c
1635607	C	T	ID=gene1485;Dbxref=GeneID:886666;Name=Rv1451;gbkey=Gene;gene_biotype=protein_coding;locus_tag=Rv1451
1636732	C	T	ID=gene1486;Dbxref=GeneID:886595;Name=PE_PGRS28;gbkey=Gene;gene=PE_PGRS28;gene_biotype=protein_coding;locus_tag=Rv1452c
1646940	C	T	ID=gene1494;Dbxref=GeneID:886573;Name=Rv1460;gbkey=Gene;gene_biotype=protein_coding;locus_tag=Rv1460
1705096	C	A	ID=gene1551;Dbxref=GeneID:886464;Name=Rv1513;gbkey=Gene;gene_biotype=protein_coding;locus_tag=Rv1513
1715531	G	C	ID=gene1560;Dbxref=GeneID:886445;Name=mmpL12;gbkey=Gene;gene=mmpL12;gene_biotype=protein_coding;locus_tag=Rv1522c
1715882	C	CTGAACCGCCCCGGCATGTCCGGAGACTCCAGTTCTTGGAAAGGATGGGGTCATGTCAGGTGGTTCATCGAGGAGGTACCCGCCGGAGCTGCGTGAGCGGGCGGTGCGGATGGTCGCAGAGATCCGCGGTCAGCACGATTCGGAGTGGGCAGCGATCAGTGAGGTCGCCCGTCTACTTGGTGTTGGCNNNNNNNNNNTCCTATGACAATGCACTAGCCGAGACGATCAACGGCCTATACAAGACCGAGCTGATCAAACCCGGCAAGCCCTGGCGGTCCATCGAGGATGTCGAGTTGGCCACCGCGCGCTGGGTCGACTGGTTCAACCATCGCCGCCTCTACCAGTACTGCGGCGACGTCCCGCCGGTCGAACTCGAGGCTGCCTACTACGCTCAACGCC…	ID=gene1560;Dbxref=GeneID:886445;Name=mmpL12;gbkey=Gene;gene=mmpL12;gene_biotype=protein_coding;locus_tag=Rv1522c
1719996	C	T
1779278	G	GTCGAGGTGGGGTGGTGGTAGCCATTCGGTGTGGCCGTGGGTGTTTTTGTGGGTGGTCCAGCCTTTTTCGGCGAGTCGGTTGTCGGGGCCGCAGGCCAGGGTCAGCTCGGTNNNNNNNNNNGCACACGCCGTTGTCACAACTGGTGGGCTCCAAGGCATATGCCCACAGCTCCTACCACCGTGGCGTGTTTGCTCCGGCCAGGCCCTGACGGACTCGGTGTTTATGGTTGTGCGGCGTTGTGGCGTGTGGCTTTGACTGCTGGGGGTCAATCGGGTTCGTCGTCGTCGTCTTGGTTGTGGAGGAATCGTTCGGGGTGGTGGAAGGTGTTGGTGCGGGGTTGGCCGTGG
1789445	ACGTGCGCCTCGCCGATCAGGCCCTGGCGTTGGGCGGTGGCGGTGGCGGTCAACTGTGGGGCTAGCGGTTCACCGGTGAGTGCTCGACGAGGTCCGAGATCGGCGGCGTCGGCGATGCGCCGGGCGGCGTCGGGCTTGGTGATGCGTAACCGGTTGGCCAGCGCGCAGCACAGCGTGCCGCCCAGTTCTTCCTCGCTGGCTTGGGCGTCAAGTTGGTTGATCAACGCGTGACCCACCGCCGGTAGCCGGCGCA	ATGTGCGCCTCGCCGATCAGGCCCTGGCGTTGGGCGGTGGCGGTGGCGGTCAACTGTGGGGCTAGCGGTTCGCCGGTGAGTGCTCGACGAGGTCCGAGATCGGCGGCTTCGGCGATGCGTAGGGCGGCGTCGGGCTTGGTGATGCGTAACCGGTTGGCCAGCGCGCAGCACAGCGTGCCGCCCAGTTCTTCCTCGCTGGCTTGGGTGTCGAGTTGGTTGATCAACGTGTGCCCGACCGCCGGTAGCCGGCGCG	ID=gene1624;Dbxref=GeneID:886325;Name=Rv1588c;gbkey=Gene;gene_biotype=protein_coding;locus_tag=Rv1588c
1789516	A	G	ID=gene1624;Dbxref=GeneID:886325;Name=Rv1588c;gbkey=Gene;gene_biotype=protein_coding;locus_tag=Rv1588c
1789650	C	T	ID=gene1624;Dbxref=GeneID:886325;Name=Rv1588c;gbkey=Gene;gene_biotype=protein_coding;locus_tag=Rv1588c
1789654	A	G	ID=gene1624;Dbxref=GeneID:886325;Name=Rv1588c;gbkey=Gene;gene_biotype=protein_coding;locus_tag=Rv1588c
1789671	C	T	ID=gene1624;Dbxref=GeneID:886325;Name=Rv1588c;gbkey=Gene;gene_biotype=protein_coding;locus_tag=Rv1588c
1789675	A	C	ID=gene1624;Dbxref=GeneID:886325;Name=Rv1588c;gbkey=Gene;gene_biotype=protein_coding;locus_tag=Rv1588c
1789678	C	G	ID=gene1624;Dbxref=GeneID:886325;Name=Rv1588c;gbkey=Gene;gene_biotype=protein_coding;locus_tag=Rv1588c
1801948	G	C	ID=gene1636;Dbxref=GeneID:886298;Name=hisC1;gbkey=Gene;gene=hisC1;gene_biotype=protein_coding;gene_synonym=hisC;locus_tag=Rv1600
1854412	C	T	ID=gene1683;Dbxref=GeneID:885287;Name=Rv1645c;gbkey=Gene;gene_biotype=protein_coding;locus_tag=Rv1645c
1861042	A	G	ID=gene1688;Dbxref=GeneID:885283;Name=pheT;gbkey=Gene;gene=pheT;gene_biotype=protein_coding;locus_tag=Rv1650
1889070	G	GAACCGCCCCGGTGAGTCCGGAGACTCTCTGATCTGAGACCTCAGCCGGCGGCTGGTCTCTGGCGTTGAGCGTAGTAGGCAGCCTCGAGTTCGACCGGCGGGACGTCGCCGCAGTACTGGTAGAGGCGGCGATGGTTGAACCAGTCGACCCAGCGCGCGGTGGCCAACTCGACATCCTCGATGGACCGCCAGGGCTTGCGGGGTTTGATCAGCTCGGTCTTGTATAGGCCGTTGATCGTCTCGGCTAGTGCATTGTCATAGGNNNNNNNNNNGGAACCACCTGACATGACCCCATCCTTTCCAAGAACTGGAGTCTCCGGACATGCCGGGGCGGTTCACGGTG	ID=gene1702;Dbxref=GeneID:885519;Name=pks9;gbkey=Gene;gene=pks9;gene_biotype=protein_coding;locus_tag=Rv1664
1906321	A	C
1938311	G	A	ID=gene1749;Dbxref=GeneID:885116;Name=scpB;gbkey=Gene;gene=scpB;gene_biotype=protein_coding;locus_tag=Rv1710
1955438	G	C	ID=gene1770;Dbxref=GeneID:885194;Name=Rv1729c;gbkey=Gene;gene_biotype=protein_coding;locus_tag=Rv1729c
1960391	G	C	ID=gene1774;Dbxref=GeneID:885214;Name=Rv1733c;gbkey=Gene;gene_biotype=protein_coding;locus_tag=Rv1733c
1983313	T	G	ID=gene1796;Dbxref=GeneID:885544;Name=PPE24;gbkey=Gene;gene=PPE24;gene_biotype=protein_coding;locus_tag=Rv1753c
2022126	G	C	ID=gene1821;Dbxref=GeneID:885898;Name=eccC5;gbkey=Gene;gene=eccC5;gene_biotype=protein_coding;locus_tag=Rv1783
2074514	G	C
2160488	A	C	ID=gene1952;Dbxref=GeneID:885639;Name=aceAa;gbkey=Gene;gene=aceAa;gene_biotype=protein_coding;gene_synonym=icl2a;locus_tag=Rv1915
2165428	T	A	ID=gene1954;Dbxref=GeneID:885362;Name=PPE34;gbkey=Gene;gene=PPE34;gene_biotype=protein_coding;locus_tag=Rv1917c
2201198	C	T	ID=gene1989;Dbxref=GeneID:885970;Name=vapC14;gbkey=Gene;gene=vapC14;gene_biotype=protein_coding;locus_tag=Rv1953
2211714	A	G	ID=gene2005;Dbxref=GeneID:885942;Name=mce3C;gbkey=Gene;gene=mce3C;gene_biotype=protein_coding;locus_tag=Rv1968
2261012	GC	G
2271368	G	A	ID=gene2063;Dbxref=GeneID:888782;Name=Rv2025c;gbkey=Gene;gene_biotype=protein_coding;locus_tag=Rv2025c
2300552	T	G	ID=gene2086;Dbxref=GeneID:888350;Name=pks12;gbkey=Gene;gene=pks12;gene_biotype=protein_coding;locus_tag=Rv2048c
2383915	GGTTCCAGATAC	G	ID=gene2163;Dbxref=GeneID:888711;Name=metH;gbkey=Gene;gene=metH;gene_biotype=protein_coding;locus_tag=Rv2124c
2392489	C	T
2423450	CCCGCCGTCACCGATCAGCCTGGCGTTGCCGCCGGCG	C	ID=gene2203;Dbxref=GeneID:887300;Name=PE_PGRS38;gbkey=Gene;gene=PE_PGRS38;gene_biotype=protein_coding;locus_tag=Rv2162c
2436936	G	A	ID=gene2213;Dbxref=GeneID:887528;Name=mptA;gbkey=Gene;gene=mptA;gene_biotype=protein_coding;locus_tag=Rv2174
2463195	T	C
2467937	G	A	ID=gene2241;Dbxref=GeneID:888551;Name=adoK;gbkey=Gene;gene=adoK;gene_biotype=protein_coding;locus_tag=Rv2202c
2496830	G	A	ID=gene2264;Dbxref=GeneID:887857;Name=caeA;gbkey=Gene;gene=caeA;gene_biotype=protein_coding;locus_tag=Rv2224c
2628914	A	G	ID=gene2399;Dbxref=GeneID:885999;Name=plcB;gbkey=Gene;gene=plcB;gene_biotype=protein_coding;gene_synonym=mpcB;locus_tag=Rv2350c
2639028	C	G
2662958	G	A	ID=gene2426;Dbxref=GeneID:885822;Name=mbtE;gbkey=Gene;gene=mbtE;gene_biotype=protein_coding;locus_tag=Rv2380c
2671091	G	T	ID=gene2428;Dbxref=GeneID:885908;Name=mbtC;gbkey=Gene;gene=mbtC;gene_biotype=protein_coding;locus_tag=Rv2382c
2767631	C	T	ID=gene2519;Dbxref=GeneID:888500;Name=Rv2464c;gbkey=Gene;gene_biotype=protein_coding;locus_tag=Rv2464c
2776641	T	C	ID=gene2530;Dbxref=GeneID:888606;Name=Rv2474c;gbkey=Gene;gene_biotype=protein_coding;locus_tag=Rv2474c
2788216	G	A	ID=gene2536;Dbxref=GeneID:887848;Name=plsB2;gbkey=Gene;gene=plsB2;gene_biotype=protein_coding;locus_tag=Rv2482c
2819180	C	T	ID=gene2560;Dbxref=GeneID:888503;Name=scoA;gbkey=Gene;gene=scoA;gene_biotype=protein_coding;locus_tag=Rv2504c
2821864	C	A	ID=gene2562;Dbxref=GeneID:888516;Name=Rv2506;gbkey=Gene;gene_biotype=protein_coding;locus_tag=Rv2506
2829779	T	C	ID=gene2569;Dbxref=GeneID:888515;Name=Rv2512c;gbkey=Gene;gene_biotype=protein_coding;locus_tag=Rv2512c
2907675	G	T	ID=gene2642;Dbxref=GeneID:887691;Name=ppiB;gbkey=Gene;gene=ppiB;gene_biotype=protein_coding;gene_synonym=ppi;locus_tag=Rv2582
2924212	C	T	ID=gene2652;Dbxref=GeneID:888173;Name=ruvB;gbkey=Gene;gene=ruvB;gene_biotype=protein_coding;locus_tag=Rv2592c
2944833	G	C	ID=gene2677;Dbxref=GeneID:888215;Name=PE_PGRS45;gbkey=Gene;gene=PE_PGRS45;gene_biotype=protein_coding;locus_tag=Rv2615c
2945167	G	T
3029422	G	C	ID=gene2779;Dbxref=GeneID:887775;Name=Rv2716;gbkey=Gene;gene_biotype=protein_coding;locus_tag=Rv2716
3047931	G	A	ID=gene2798;Dbxref=GeneID:888389;Name=Rv2735c;gbkey=Gene;gene_biotype=protein_coding;locus_tag=Rv2735c
3055652	G	C	ID=gene2805;Dbxref=GeneID:888332;Name=Rv2742c;gbkey=Gene;gene_biotype=protein_coding;locus_tag=Rv2742c
3062139	A	G	ID=gene2811;Dbxref=GeneID:888408;Name=ftsK;gbkey=Gene;gene=ftsK;gene_biotype=protein_coding;locus_tag=Rv2748c
3088614	A	G	ID=gene2843;Dbxref=GeneID:888488;Name=Rv2781c;gbkey=Gene;gene_biotype=protein_coding;locus_tag=Rv2781c
3097404	C	T	ID=gene2850;Dbxref=GeneID:888253;Name=sirR;gbkey=Gene;gene=sirR;gene_biotype=protein_coding;locus_tag=Rv2788
3112313	GAGCTGTTGGACCCGGACCGGCACGACACGGCGCGCTTCTCCAGCGATGTTGAGGTTCTCGACCACTGGCTGCGCCGAGTCGCGCCCGTCGCGGCTGCCGCCGGCACGGCCGCTACGTGGGTGCTCTGTCGAGGCCGGCGGGTAGTTG	G
3122667	G	A
3122774	CCGGAAGTCAACTAGAGCGGGTGTCGAACGCTGCCCGGTTTCCGTCCCCTCTCGGGGTTTTGGGTCTGACGACATGCGAATCCGCTGTCAGCACATGGGATTCCGAGTGTTTCCGTCCCCTCTCGGGGTTTTGGGTCTGACGACC	C
3125708	C	CTGAACCGCCCCGGCATGTCCGGAGACTCCAGTTCTTGGAAAGGATGGGGTCATGTCAGGTGGTTCATCGAGGAGGTACCCGCCGGAGCTGCGTGAGCGGGCGGTGCGGATGGTCGCAGAGATCCGCGGTCAGCACGATTCGGAGTGGGCAGCGATCAGTGAGGTCGCCCGTCTACTTGGTGTNNNNNNNNNNGCCTATACAAGACCGAGCTGATCAAACCCGGCAAGCCCTGGCGGTCCATCGAGGATGTCGAGTTGGCCACCGCGCGCTGGGTCGACTGGTTCAACCATCGCCGCCTCTACCAGTACTGCGGCGACGTCCCGCCGGTCGAACTCGAGGCTGCCTACTACGCTCAACGCCAGAGACCAGCCGCCGGCTGAGGTCTCAGATCAGAGAGT…	ID=gene2878;Dbxref=GeneID:888510;Name=Rv2818c;gbkey=Gene;gene_biotype=protein_coding;locus_tag=Rv2818c
3136335	G	A	ID=gene2889;Dbxref=GeneID:14515869;Name=Rv2828A;gbkey=Gene;gene_biotype=protein_coding;locus_tag=Rv2828A
3159936	G	A	ID=gene2911;Dbxref=GeneID:887364;Name=Rv2850c;gbkey=Gene;gene_biotype=protein_coding;locus_tag=Rv2850c
3163994	C	G	ID=gene2914;Dbxref=GeneID:888171;Name=PE_PGRS48;gbkey=Gene;gene=PE_PGRS48;gene_biotype=protein_coding;locus_tag=Rv2853
3193602	C	T	ID=gene2944;Dbxref=GeneID:887443;Name=Rv2884;gbkey=Gene;gene_biotype=protein_coding;locus_tag=Rv2884
3247865	GCAAA	G	ID=gene2992;Dbxref=GeneID:888183;Name=ppsA;gbkey=Gene;gene=ppsA;gene_biotype=protein_coding;locus_tag=Rv2931
3258368	A	C	ID=gene2994;Dbxref=GeneID:887686;Name=ppsC;gbkey=Gene;gene=ppsC;gene_biotype=protein_coding;locus_tag=Rv2933
3269805	A	C	ID=gene2996;Dbxref=GeneID:888210;Name=ppsE;gbkey=Gene;gene=ppsE;gene_biotype=protein_coding;locus_tag=Rv2935
3281659	C	T	ID=gene3001;Dbxref=GeneID:887982;Name=mas;gbkey=Gene;gene=mas;gene_biotype=protein_coding;locus_tag=Rv2940c
3307882	T	G	ID=gene3017;Dbxref=GeneID:887318;Name=Rv2955c;gbkey=Gene;gene_biotype=protein_coding;locus_tag=Rv2955c
3311442	G	A	ID=gene3020;Dbxref=GeneID:887816;Name=Rv2958c;gbkey=Gene;gene_biotype=protein_coding;locus_tag=Rv2958c
3347480	G	A	ID=gene3054;Dbxref=GeneID:887176;Name=Rv2990c;gbkey=Gene;gene_biotype=protein_coding;locus_tag=Rv2990c
3349564	A	C	ID=gene3058;Dbxref=GeneID:887850;Name=gltS;gbkey=Gene;gene=gltS;gene_biotype=protein_coding;gene_synonym=gltX;locus_tag=Rv2992c
3369382	G	A	ID=gene3076;Dbxref=GeneID:888509;Name=pfkA;gbkey=Gene;gene=pfkA;gene_biotype=protein_coding;locus_tag=Rv3010c
3376685	G	A	ID=gene3083;Dbxref=GeneID:888508;Name=esxQ;gbkey=Gene;gene=esxQ;gene_biotype=protein_coding;gene_synonym=ES6_8,TB12.9;locus_tag=Rv3017c
3380982	T	G	ID=gene3089;Dbxref=GeneID:3205088;Name=PE29;gbkey=Gene;gene=PE29;gene_biotype=protein_coding;locus_tag=Rv3022A
3381641	G	T	ID=gene3090;Dbxref=GeneID:888525;Name=Rv3023c;gbkey=Gene;gene_biotype=protein_coding;locus_tag=Rv3023c
3433011	G	A	ID=gene3137;Dbxref=GeneID:888826;Name=pgmA;gbkey=Gene;gene=pgmA;gene_biotype=protein_coding;locus_tag=Rv3068c
3482432	C	A	ID=gene3186;Dbxref=GeneID:888790;Name=Rv3115;gbkey=Gene;gene_biotype=protein_coding;locus_tag=Rv3115
3485475	A	G	ID=gene3190;Dbxref=GeneID:888811;Name=moaE1;gbkey=Gene;gene=moaE1;gene_biotype=protein_coding;gene_synonym=moaE;locus_tag=Rv3119
3585610	A	G	ID=gene3283;Dbxref=GeneID:887905;Name=Rv3208;gbkey=Gene;gene_biotype=protein_coding;locus_tag=Rv3208
3594343	AGGCCCATTGCCGTCCTCCTCAACGGGCCGACCCGGCCCGCATCGTCACACGGCCTAAGCCCATTGCCGTCCTCCTCAACGGGCCGACCCGGCCCGCATCGTCACACGGCCTA	A
3594394	G	C
3594395	G	A
3594398	T	C
3594400	A	G
3612665	A	G	ID=gene3313;Dbxref=GeneID:888861;Name=kefB;gbkey=Gene;gene=kefB;gene_biotype=protein_coding;gene_synonym=kefB;locus_tag=Rv3236c
3710381	CTGAACCGCCCCGGCATGTCCGGAGACTCCAGTTCTTGGAAAGGATGGGGTCATGTCAGGTGGTTCATCGAGGAGGTACCCGCCGGAGCTGCGTGAGCGGGCGGTGCGGATGGTCGCAGAGATCCGCGGTCAGCACGATTCGGAGTGGGCAGCGATCAGTGAGGTCGCCCGTCTACTTGGTGTTGGCTGCGCGGAGACGGTGCGTAAGTGGGTGCGCCAGGCGCAGGTCGATGCCGGCGCACGGCCCGGGACCACGACCGAAGAATCCGCTGAGCTGAAGCGCTTGCGGCGGGACAACGCCGAATTGCGAAGGGCGAACGCGATTTTAAAGACCGCGTCGGCTTTCTTCGCGGCCGAGCTCGACCGGCCAGCACGCTAATTACCCGGTTCATCGCCGAT…	CAGATATCGGGGTGATGATTGAATTTGTCGGCGATGGCGGCGATCTTCGCCACAAATTTCATGGATTGATCGAAGCTCCCAAACCCAAATGTGTGGCGGAGCTTTCCATCGACGAGCTCCCACCCGGGCAGTGCCGTCAACCTCTCGGACAGCTCCCTGTCGGNNNNNNNNNNGTGTCTGGCTCACTTTGCGTCTGCCGTCCTCTTGGGGTTGGCGTTGAGCAGTATTGCCGGCACTAGGTGAGAAGGACCGGCCGGCGTGACTTGATAGGAGCGTGGCTTTCGCCCCGACTGAGATGTGTCCGCCGACCGGCCCAACCTCAACACCCCCTCAAGTGAAGGAGGCAACCACCATGGTTGTTGTTGGAACCGATGCGCACAAGTACAGCCACACCTTTGT…
3716031	C	T	ID=gene3408;Dbxref=GeneID:887607;Name=dacB1;gbkey=Gene;gene=dacB1;gene_biotype=protein_coding;locus_tag=Rv3330
3730642	G	A	ID=gene3420;Dbxref=GeneID:888033;Name=PPE54;gbkey=Gene;gene=PPE54;gene_biotype=protein_coding;locus_tag=Rv3343c
3732310	G	A	ID=gene3420;Dbxref=GeneID:888033;Name=PPE54;gbkey=Gene;gene=PPE54;gene_biotype=protein_coding;locus_tag=Rv3343c
3732655	CGCCAACCCGACATTGCCAA	CCCGAGCCCAAAGTTGCCCC	ID=gene3420;Dbxref=GeneID:888033;Name=PPE54;gbkey=Gene;gene=PPE54;gene_biotype=protein_coding;locus_tag=Rv3343c
3744940	A	G	ID=gene3424;Dbxref=GeneID:888120;Name=PPE55;gbkey=Gene;gene=PPE55;gene_biotype=protein_coding;locus_tag=Rv3347c
3773573	T	C
3784011	C	T	ID=gene3447;Dbxref=GeneID:887259;Name=dnaE2;gbkey=Gene;gene=dnaE2;gene_biotype=protein_coding;locus_tag=Rv3370c
3820523	G	A
3842308	TTTTTCGCCTCCGGGCAATTGCGAGAATTGGCTTACTCAGTTGAAACGACGGCTGAGTCGCTCGAGGACGAGCTCGACGAGCTGGATGAGAACTGGAAAGGTAGTTCGTCGGACTTGTTGGCCGACGCGGTTGAGCGGTATCTCCAATGGCTGTCTAAACACTCCAGTCAGCTTAAGCATGCCGCCTGGGTGATCAACGGCCTCGCGAACGCCTATAACGACACACGTCGGAAGGTGGTACCCCCGGAGGAGATCGCCGCCAACCGCGAGGAGAGGCGCAGGCTGATCGCGAGCAACGTGGCCGGGGTAAACACTCCAGCAATCGCAGACCTCGATGCACAATACGACCAGTACCGGGCCCGCAATGTCGCTGTAATGAACGCCTATGTAAGTTGGACC…	T	ID=gene3501;Dbxref=GeneID:887635;Name=PPE57;gbkey=Gene;gene=PPE57;gene_biotype=protein_coding;locus_tag=Rv3425
3847215	T	C	ID=gene3505;Dbxref=GeneID:887630;Name=PPE59;gbkey=Gene;gene=PPE59;gene_biotype=protein_coding;locus_tag=Rv3429
3847221	T	C	ID=gene3505;Dbxref=GeneID:887630;Name=PPE59;gbkey=Gene;gene=PPE59;gene_biotype=protein_coding;locus_tag=Rv3429
3871445	C	T	ID=gene3526;Dbxref=GeneID:887619;Name=eccB4;gbkey=Gene;gene=eccB4;gene_biotype=protein_coding;locus_tag=Rv3450c
3883767	GTTACGCATCACCAAGCCCGACGCCGCCCGGCGCATCGCCGACGCCGCCGATCTCGGACCTCGTCGAGCACTCACCGGTGAACCGCTAGCCCCACAGTTGACCGCCACCGCCACCGCCCAACGCCAGGGCCTGATCGGCGAGGCGCACGTCAAAGTGATTCGCGCCCTTTTTCGCCCACCTGCCCGCCGCGGTGGATGTGTCCACCCGCCAGGCCGCCGAAGCCGACCTGGCCGGCAAAGCCGCTCAATATCGTCCCGACGAGCTGGCCCGCTACGCCCAGCGGGTCATGGACTGGCTACACCCCGACGGCGACCTCACCGACACCGAACGCGCCCGCAAACGCGGCATCACCCTGAGCAACCAGCAATACGACGGCATGTCACGGCTAAGTGGCTACC…	GCTGCGCATCACCAAGCCCGAAGCCGGCCGACGCAGCGCCGAAGCCAAGCCTTAGGGCAACGTCGGGCGCTCACTGGCGAACCGTTGGCCCCGCAGTTGACCGCCACCGCCACCGCCCAACGCCAGGGCCTGATCGGCGAGGCGCACGTCAAAGTGATTCGCGCCCTTTTTCGCCCACCTGCCCGCCGCGGTGGATGTGTCCACCCGCCAGGCCGCCGAAGCCGACCTGGCCGGCAAAGCCGCTCAATATCGTNNNNNNNNNNCTTCCCTCACCTCCAAGGGCGCGTCCGGGAACCACGCCCGGATCGTCTCGGCCACCTGGTCGCGGTCGCAGACGGCGCGGTCACCGGTTTCCAGGTCGGTTACCGTCACCAAGTGGTTGAAACGTGCTGGTGTGGT…	ID=gene3541;Dbxref=GeneID:887830;Name=Rv3466;gbkey=Gene;gene_biotype=protein_coding;locus_tag=Rv3466
3883768	T	C	ID=gene3541;Dbxref=GeneID:887830;Name=Rv3466;gbkey=Gene;gene_biotype=protein_coding;locus_tag=Rv3466
3883770	A	G	ID=gene3541;Dbxref=GeneID:887830;Name=Rv3466;gbkey=Gene;gene_biotype=protein_coding;locus_tag=Rv3466
3883788	C	A	ID=gene3541;Dbxref=GeneID:887830;Name=Rv3466;gbkey=Gene;gene_biotype=protein_coding;locus_tag=Rv3466
3883793	C	G	ID=gene3541;Dbxref=GeneID:887830;Name=Rv3466;gbkey=Gene;gene_biotype=protein_coding;locus_tag=Rv3466
3905330	T	G	ID=gene3558;Dbxref=GeneID:888427;Name=Rv3485c;gbkey=Gene;gene_biotype=protein_coding;locus_tag=Rv3485c
3925768	C	T	ID=gene3579;Dbxref=GeneID:888251;Name=fadD17;gbkey=Gene;gene=fadD17;gene_biotype=protein_coding;locus_tag=Rv3506
3928207	CCCGGCGGGG	C	ID=gene3580;Dbxref=GeneID:888256;Name=PE_PGRS53;gbkey=Gene;gene=PE_PGRS53;gene_biotype=protein_coding;locus_tag=Rv3507
3933939	T	G	ID=gene3581;Dbxref=GeneID:888270;Name=PE_PGRS54;gbkey=Gene;gene=PE_PGRS54;gene_biotype=protein_coding;locus_tag=Rv3508
3934096	G	A	ID=gene3581;Dbxref=GeneID:888270;Name=PE_PGRS54;gbkey=Gene;gene=PE_PGRS54;gene_biotype=protein_coding;locus_tag=Rv3508
3934141	A	C	ID=gene3581;Dbxref=GeneID:888270;Name=PE_PGRS54;gbkey=Gene;gene=PE_PGRS54;gene_biotype=protein_coding;locus_tag=Rv3508
3940909	C	T	ID=gene3584;Dbxref=GeneID:888273;Name=PE_PGRS55;gbkey=Gene;gene=PE_PGRS55;gene_biotype=protein_coding;locus_tag=Rv3511
3941497	G	C	ID=gene3584;Dbxref=GeneID:888273;Name=PE_PGRS55;gbkey=Gene;gene=PE_PGRS55;gene_biotype=protein_coding;locus_tag=Rv3511
3941499	C	A	ID=gene3584;Dbxref=GeneID:888273;Name=PE_PGRS55;gbkey=Gene;gene=PE_PGRS55;gene_biotype=protein_coding;locus_tag=Rv3511
3941572	C	CGGCCAACAA	ID=gene3584;Dbxref=GeneID:888273;Name=PE_PGRS55;gbkey=Gene;gene=PE_PGRS55;gene_biotype=protein_coding;locus_tag=Rv3511
3941723	AC	A	ID=gene3584;Dbxref=GeneID:888273;Name=PE_PGRS55;gbkey=Gene;gene=PE_PGRS55;gene_biotype=protein_coding;locus_tag=Rv3511
3943107	AACGGCGGCAGCGGCGGCGCCGGCGGCACCGGAGGCG	A
3943714	ACGGCGGCGCTGG	A
3945700	A	G	ID=gene3586;Dbxref=GeneID:888277;Name=fadD18;gbkey=Gene;gene=fadD18;gene_biotype=protein_coding;locus_tag=Rv3513c
3948362	T	G	ID=gene3587;Dbxref=GeneID:888294;Name=PE_PGRS57;gbkey=Gene;gene=PE_PGRS57;gene_biotype=protein_coding;locus_tag=Rv3514
3949001	G	A	ID=gene3587;Dbxref=GeneID:888294;Name=PE_PGRS57;gbkey=Gene;gene=PE_PGRS57;gene_biotype=protein_coding;locus_tag=Rv3514
4035305	T	C	ID=gene3667;Dbxref=GeneID:886290;Name=lpqF;gbkey=Gene;gene=lpqF;gene_biotype=protein_coding;locus_tag=Rv3593
4151996	C	T	ID=gene3786;Dbxref=GeneID:885118;Name=asd;gbkey=Gene;gene=asd;gene_biotype=protein_coding;locus_tag=Rv3708c
4168445	GCGCGGACGGGAA	G
4168470	CGCGGACGGGAAC	C
4214747	C	T	ID=gene3848;Dbxref=GeneID:885239;Name=Rv3769;gbkey=Gene;gene_biotype=protein_coding;locus_tag=Rv3769
4292834	C	T	ID=gene3906;Dbxref=GeneID:886156;Name=papA1;gbkey=Gene;gene=papA1;gene_biotype=protein_coding;locus_tag=Rv3824c
4343048	G	C	ID=gene3950;Dbxref=GeneID:886203;Name=espH;gbkey=Gene;gene=espH;gene_biotype=protein_coding;locus_tag=Rv3867
4343679	C	T	ID=gene3951;Dbxref=GeneID:886199;Name=eccA1;gbkey=Gene;gene=eccA1;gene_biotype=protein_coding;locus_tag=Rv3868
4361879	T	C	ID=gene3964;Dbxref=GeneID:886214;Name=espB;gbkey=Gene;gene=espB;gene_biotype=protein_coding;locus_tag=Rv3881c
4398843	C	G	ID=gene3993;Dbxref=GeneID:886247;Name=Rv3910;gbkey=Gene;gene_biotype=protein_coding;locus_tag=Rv3910
4399179	C	T	ID=gene3993;Dbxref=GeneID:886247;Name=Rv3910;gbkey=Gene;gene_biotype=protein_coding;locus_tag=Rv3910
